# Supplementary material for: Clinical Decision Analysis of Genetic Evaluation and Testing in 1013 Intensive Care Unit Infants with Congenital Heart Defects Supports Universal Genetic Testing
Source: MDPI journal article supplement (doi:10.3390/genes15040505), 2024-04-18
Supplement: s1 [file s1]

## List of Genetic Diagnoses by Extracardiac Anomaly Status and Genetic Test Type

### 1. Cytogenetic Diagnoses in Infants with Congenital Heart Defects and No Extracardiac Anomalies

| Diagnoses                                                                                                    | Frequency | Percent | Cumulative Frequency | Cumulative Percent |
|--------------------------------------------------------------------------------------------------------------|-----------|---------|----------------------|--------------------|
| 15q11.2 deletion (proximal BP1-BP2)                                                                          | 2         | 3.51    | 2                    | 3.51               |
| 15q11.2 deletion (proximal BP1-BP2) & 1p12 duplication involving portion of NOTCH2                           | 1         | 1.75    | 3                    | 5.26               |
| 15q11.2 deletion (proximal, BP1-BP2)                                                                         | 1         | 1.75    | 4                    | 7.02               |
| 16p11.2 deletion syndrome                                                                                    | 1         | 1.75    | 5                    | 8.77               |
| 16p11.2 duplication syndrome                                                                                 | 2         | 3.51    | 7                    | 12.28              |
| 17p13.3 microduplication syndrome                                                                            | 1         | 1.75    | 8                    | 14.04              |
| 18p11.32-p11.23 duplication & 18q21.32-q23 deletion                                                          | 1         | 1.75    | 9                    | 15.79              |
| 1q21 deletion syndrome                                                                                       | 1         | 1.75    | 10                   | 17.54              |
| 1q21.1 duplication syndrome                                                                                  | 1         | 1.75    | 11                   | 19.30              |
| 22q11.2 deletion syndrome                                                                                    | 14        | 24.56   | 25                   | 43.86              |
| 22q11.2 duplication syndrome                                                                                 | 1         | 1.75    | 26                   | 45.61              |
| 3q29 duplication syndrome                                                                                    | 1         | 1.75    | 27                   | 47.37              |
| 6p25.3p25.1 duplication and 9p24.2 duplication and 9q34.3 duplication due to parental balanced translocation | 1         | 1.75    | 28                   | 49.12              |
| 8p23.1 duplication syndrome                                                                                  | 2         | 3.51    | 30                   | 52.63              |
| Distal 22q11.2 duplication syndrome                                                                          | 1         | 1.75    | 31                   | 54.39              |
| Distal 4q- syndrome/Distal monosomy 4q                                                                       | 1         | 1.75    | 32                   | 56.14              |
| Hereditary neuropathy with liability to pressure palsies (HNLPP)                                             | 1         | 1.75    | 33                   | 57.89              |
| Jacobsen syndrome                                                                                            | 1         | 1.75    | 34                   | 59.65              |
| NODAL-related disorder/heterotaxy visceral 5                                                                 | 1         | 1.75    | 35                   | 61.40              |
| Ring chromosome 18 syndrome                                                                                  | 1         | 1.75    | 36                   | 63.16              |
| Trisomy 18                                                                                                   | 2         | 3.51    | 38                   | 66.67              |
| Trisomy 21                                                                                                   | 10        | 17.54   | 48                   | 84.21              |
| Trisomy 21 (14;21 Robertsonian translocation)                                                                | 1         | 1.75    | 49                   | 85.96              |
| Turner syndrome                                                                                              | 4         | 7.02    | 53                   | 92.98              |
| Turner syndrome (mosaic with structural X chromosome anomalies)                                              | 1         | 1.75    | 54                   | 94.74              |
| Turner syndrome (mosaic)                                                                                     | 1         | 1.75    | 55                   | 96.49              |

|                                                                                                               |   |      |    |        |
|---------------------------------------------------------------------------------------------------------------|---|------|----|--------|
| <b>Williams syndrome</b>                                                                                      | 1 | 1.75 | 56 | 98.25  |
| <b>Xq28 deletion (BRCC3) moyamoya disease-short stature-facial dysmorphism-hypergonadotropic hypogonadism</b> | 1 | 1.75 | 57 | 100.00 |

## List of Genetic Diagnoses by Extracardiac Anomaly Status and Genetic Test Type

### 2. Cytogenetic Diagnoses in Infants with Congenital Heart Defects with Extracardiac Anomalies

| Diagnosis                                                                                                                                                        | Frequency | Percent | Cumulative Frequency | Cumulative Percent |
|------------------------------------------------------------------------------------------------------------------------------------------------------------------|-----------|---------|----------------------|--------------------|
| 11q25 deletion and 19q13.31q13.43 duplication due to parental balanced translocation                                                                             | 1         | 0.91    | 1                    | 0.91               |
| 15q11.2 deletion (proximal, BP1-BP2)                                                                                                                             | 1         | 0.91    | 2                    | 1.82               |
| 15q11.2q26.3 Duplication (partial trisomy 15q)                                                                                                                   | 1         | 0.91    | 3                    | 2.73               |
| 15q25 microdeletion syndrome/Diamond-Blackfan anemia (RPS17)                                                                                                     | 1         | 0.91    | 4                    | 3.64               |
| 15q25.3q26.3 Deletion (13.9 Mb) due to parental balanced translocation                                                                                           | 1         | 0.91    | 5                    | 4.55               |
| 16p11.2 deletion syndrome                                                                                                                                        | 3         | 2.73    | 8                    | 7.27               |
| 16p13.3 deletion syndrome/alpha-thalassemia-intellectual disability syndrome linked to chromosome 16                                                             | 1         | 0.91    | 9                    | 8.18               |
| 1p36 deletion syndrome                                                                                                                                           | 2         | 1.82    | 11                   | 10.00              |
| 1p36 deletion syndrome & 11p15 duplication syndrome (Beckwith-Wiedemann syndrome) due to unbalanced translocation (from parental balanced translocation carrier) | 1         | 0.91    | 12                   | 10.91              |
| 1p36 deletion syndrome (with large 13q33.1-q34 duplication) resulting from unbalanced 1;13 translocation                                                         | 1         | 0.91    | 13                   | 11.82              |
| 1q21 deletion syndrome                                                                                                                                           | 3         | 2.73    | 16                   | 14.55              |
| 1q21 deletion syndrome & Trisomy X syndrome                                                                                                                      | 1         | 0.91    | 17                   | 15.45              |
| 1q21.1 duplication syndrome                                                                                                                                      | 1         | 0.91    | 18                   | 16.36              |
| 1q43-q44 deletion syndrome (1q42.2-q44 deletion/distal monosomy 1q)                                                                                              | 1         | 0.91    | 19                   | 17.27              |
| 22q11.2 deletion syndrome                                                                                                                                        | 21        | 19.09   | 40                   | 36.36              |
| 22q11.2 deletion syndrome & 21q22.13q22.3 duplication                                                                                                            | 1         | 0.91    | 41                   | 37.27              |
| 22q11.2 deletion syndrome & first-degree parental consanguinity                                                                                                  | 1         | 0.91    | 42                   | 38.18              |
| 4q26-q35.3 Duplication                                                                                                                                           | 1         | 0.91    | 43                   | 39.09              |
| 5p13 duplication syndrome                                                                                                                                        | 1         | 0.91    | 44                   | 40.00              |
| 5q22.2-q31.2 (24 Mb) deletion (contains 190 genes)                                                                                                               | 1         | 0.91    | 45                   | 40.91              |
|                                                                                                                                                                  |           |         |                      |                    |

|                                                                                                                                                                                                      |    |       |     |       |
|------------------------------------------------------------------------------------------------------------------------------------------------------------------------------------------------------|----|-------|-----|-------|
| 5q31.3-q35 duplication                                                                                                                                                                               | 1  | 0.91  | 46  | 41.82 |
| 6p25.3-p25.1 deletion & 9q34.3 duplication due to unbalanced translocation (from a parental balanced translocation)                                                                                  | 1  | 0.91  | 47  | 42.73 |
| 7q11.23 duplication syndrome                                                                                                                                                                         | 1  | 0.91  | 48  | 43.64 |
| 8p23.1 duplication (involves SOX7 but not GATA4) & Xp22.33/Yp11.32 (SHOX) & 19p13.3 deletion (STK11 and numerous other genes) due to unbalanced translocation (from parental balanced translocation) | 1  | 0.91  | 49  | 44.55 |
| 8p23.1 duplication syndrome                                                                                                                                                                          | 1  | 0.91  | 50  | 45.45 |
| Alagille syndrome (20p12 deletion)                                                                                                                                                                   | 1  | 0.91  | 51  | 46.36 |
| Emanuel syndrome                                                                                                                                                                                     | 1  | 0.91  | 52  | 47.27 |
| FOXF1-related disorder/congenital alveolar capillary dysplasia                                                                                                                                       | 1  | 0.91  | 53  | 48.18 |
| Jacobsen syndrome                                                                                                                                                                                    | 1  | 0.91  | 54  | 49.09 |
| Kleefstra syndrome (9q34 microdeletion syndrome)                                                                                                                                                     | 1  | 0.91  | 55  | 50.00 |
| Mowat-Wilson syndrome                                                                                                                                                                                | 2  | 1.82  | 57  | 51.82 |
| Partial trisomy 5p and 13q11-q12.11 deletion (resulting from unbalanced 5;13 translocation)                                                                                                          | 1  | 0.91  | 58  | 52.73 |
| Recombinant chromosome 8 syndrome                                                                                                                                                                    | 2  | 1.82  | 60  | 54.55 |
| Ring chromosome 12 syndrome                                                                                                                                                                          | 1  | 0.91  | 61  | 55.45 |
| Supernumerary derivative chromosome 21 & partial trisomy 1q: 47,XX,+der(21)t(1;21)(q31.3;q21.3) causing partial trisomy 21 (pter-q21.3 and partial trisomy 1 (q31.3-qter)                            | 1  | 0.91  | 62  | 56.36 |
| Terminal 3pterp22.2 duplication and 12q24.33qter deletion resulting from parental balanced translocation                                                                                             | 1  | 0.91  | 63  | 57.27 |
| Tetrasomy X                                                                                                                                                                                          | 1  | 0.91  | 64  | 58.18 |
| Trisomy 13                                                                                                                                                                                           | 2  | 1.82  | 66  | 60.00 |
| Trisomy 13 (mosaic)                                                                                                                                                                                  | 2  | 1.82  | 68  | 61.82 |
| Trisomy 13 (mosaic, Robertsonian)                                                                                                                                                                    | 1  | 0.91  | 69  | 62.73 |
| Trisomy 16 (mosaic) & Possible UPD16                                                                                                                                                                 | 1  | 0.91  | 70  | 63.64 |
| Trisomy 18                                                                                                                                                                                           | 11 | 10.00 | 81  | 73.64 |
| Trisomy 21                                                                                                                                                                                           | 17 | 15.45 | 98  | 89.09 |
| Trisomy 21 & Klinefelter syndrome                                                                                                                                                                    | 2  | 1.82  | 100 | 90.91 |
| Trisomy 21 (partial) & 2p25.3-p23.1 duplication (unbalanced translocation) due to parental balanced translocation                                                                                    | 1  | 0.91  | 101 | 91.82 |
| Trisomy 22                                                                                                                                                                                           | 1  | 0.91  | 102 | 92.73 |
| Turner syndrome                                                                                                                                                                                      | 2  | 1.82  | 104 | 94.55 |

|                                                                                                                                                                               |   |      |     |        |
|-------------------------------------------------------------------------------------------------------------------------------------------------------------------------------|---|------|-----|--------|
| <b>Unbalanced chromosome translocation resulting in: 47,XX,+der(9)t(5;9)(p13;q21) leading to 78.5 Mb Duplication at 9pter-q21.13 &amp; 29.1 Mb Duplication at 5pter-p13.3</b> | 1 | 0.91 | 105 | 95.45  |
| <b>Unbalanced translocation: 46,XX,der(18)t(18:20)(q22;p11.2) -- resulting in 13.2 Mb 18q22.1q23 deletion &amp; 18.3 Mb 20p13p11.23 duplication</b>                           | 1 | 0.91 | 106 | 96.36  |
| <b>Unbalanced translocation: 46,XY,t(3;11)(p13;q25)</b>                                                                                                                       | 1 | 0.91 | 107 | 97.27  |
| <b>Williams syndrome</b>                                                                                                                                                      | 2 | 1.82 | 109 | 99.09  |
| <b>Wolf-Hirschhorn syndrome</b>                                                                                                                                               | 1 | 0.91 | 110 | 100.00 |
|                                                                                                                                                                               |   |      |     |        |

## List of Genetic Diagnoses by Extracardiac Anomaly Status and Genetic Test Type

### 3. Molecular Diagnoses in Infants with Congenital Heart Defects and No Extracardiac Anomalies

| Diagnosis                                           | Frequency | Percent | Cumulative Frequency | Cumulative Percent |
|-----------------------------------------------------|-----------|---------|----------------------|--------------------|
| ABCC9-related disorder/Cantu syndrome               | 2         | 10.00   | 2                    | 10.00              |
| Adams-Oliver syndrome (DOCK6)                       | 1         | 5.00    | 3                    | 15.00              |
| BMPR1A-Related Disorder/Juvenile Polyposis syndrome | 1         | 5.00    | 4                    | 20.00              |
| CHARGE syndrome                                     | 1         | 5.00    | 5                    | 25.00              |
| Costello syndrome (HRAS)                            | 1         | 5.00    | 6                    | 30.00              |
| DiGeorge syndrome (TBX1)                            | 1         | 5.00    | 7                    | 35.00              |
| Ehlers-Danlos syndrome (Vascular)                   | 1         | 5.00    | 8                    | 40.00              |
| FLNA-related disorder/cardiac valvular dysplasia    | 1         | 5.00    | 9                    | 45.00              |
| FLT4-related disorder                               | 2         | 10.00   | 11                   | 55.00              |
| FOXJ1-related disorder/primary ciliary dyskinesia   | 1         | 5.00    | 12                   | 60.00              |
| GATA4-related disorder & CDK13-related disorder     | 1         | 5.00    | 13                   | 65.00              |
| GATA6-related disorder                              | 1         | 5.00    | 14                   | 70.00              |
| MYH7-related disorder (Ebstein anomaly with LVNC)   | 1         | 5.00    | 15                   | 75.00              |
| NOTCH1-related disorder                             | 1         | 5.00    | 16                   | 80.00              |
| Neurofibromatosis-Noonan syndrome (NF1)             | 1         | 5.00    | 17                   | 85.00              |
| SETD5-related disorder                              | 1         | 5.00    | 18                   | 90.00              |
| TBX1-related disorder                               | 1         | 5.00    | 19                   | 95.00              |
| TRRAP-related disorder                              | 1         | 5.00    | 20                   | 100.00             |

## List of Genetic Diagnoses by Extracardiac Anomaly Status and Genetic Test Type

### 4. Molecular Diagnoses in Infants with Congenital Heart Defects with Extracardiac Anomalies

| Diagnosis                                                                                                         | Frequency | Percent | Cumulative Frequency | Cumulative Percent |
|-------------------------------------------------------------------------------------------------------------------|-----------|---------|----------------------|--------------------|
| <b>ABL1-related disorder</b>                                                                                      | 1         | 2.04    | 1                    | 2.04               |
| <b>ATRX-related disorder/alpha-thalassemia-X-linked-intellectual disability syndrome</b>                          | 1         | 2.04    | 2                    | 4.08               |
| <b>Alagille syndrome (JAG1)</b>                                                                                   | 3         | 6.12    | 5                    | 10.20              |
| <b>CDH2-related disorder</b>                                                                                      | 1         | 2.04    | 6                    | 12.24              |
| <b>CHARGE syndrome</b>                                                                                            | 7         | 14.29   | 13                   | 26.53              |
| <b>Coffin-Siris syndrome (ARID1A)</b>                                                                             | 2         | 4.08    | 15                   | 30.61              |
| <b>Diamond-Blackfan anemia (RPL11)</b>                                                                            | 1         | 2.04    | 16                   | 32.65              |
| <b>Diamond-Blackfan anemia (RPS24)</b>                                                                            | 1         | 2.04    | 17                   | 34.69              |
| <b>Diamond-Blackfan anemia (RPS26)</b>                                                                            | 1         | 2.04    | 18                   | 36.73              |
| <b>FLT4-related disorder</b>                                                                                      | 1         | 2.04    | 19                   | 38.78              |
| <b>GATA6-related disorder</b>                                                                                     | 1         | 2.04    | 20                   | 40.82              |
| <b>GLI2-related disorder</b>                                                                                      | 1         | 2.04    | 21                   | 42.86              |
| <b>Holt-Oram syndrome (TBX5)</b>                                                                                  | 1         | 2.04    | 22                   | 44.90              |
| <b>IFT172-related disorder/Jeune syndrome</b>                                                                     | 1         | 2.04    | 23                   | 46.94              |
| <b>KBG syndrome</b>                                                                                               | 1         | 2.04    | 24                   | 48.98              |
| <b>Kabuki syndrome (KMT2D)</b>                                                                                    | 2         | 4.08    | 26                   | 53.06              |
| <b>MAST1-related disorder/Mega-corpus-callosum syndrome with cerebellar hypoplasia and cortical malformations</b> | 1         | 2.04    | 27                   | 55.10              |
| <b>Noonan syndrome (PTPN11)</b>                                                                                   | 2         | 4.08    | 29                   | 59.18              |
| <b>Noonan syndrome (RAF1)</b>                                                                                     | 2         | 4.08    | 31                   | 63.27              |
| <b>Noonan syndrome (SOS1)</b>                                                                                     | 2         | 4.08    | 33                   | 67.35              |
| <b>PACS1-related syndrome/Schuurs-Hoeijmakers syndrome</b>                                                        | 1         | 2.04    | 34                   | 69.39              |
| <b>PEX5-related peroxisomal biogenesis disorder (Zellweger)</b>                                                   | 1         | 2.04    | 35                   | 71.43              |
| <b>PUF60-related disorder/Verheij syndrome</b>                                                                    | 1         | 2.04    | 36                   | 73.47              |
| <b>Primary ciliary dyskinesia (DNAH11)</b>                                                                        | 2         | 4.08    | 38                   | 77.55              |
| <b>Primary ciliary dyskinesia (DNAH9)</b>                                                                         | 1         | 2.04    | 39                   | 79.59              |
|                                                                                                                   |           |         |                      |                    |

|                                                                                            |   |      |    |        |
|--------------------------------------------------------------------------------------------|---|------|----|--------|
| <b>SIN3A-related disorder</b>                                                              | 1 | 2.04 | 40 | 81.63  |
| <b>SNIP1-related disorder</b>                                                              | 2 | 4.08 | 42 | 85.71  |
| <b>SPECC1L-related hypertelorism syndrome/Teebi hypertelorism syndrome</b>                 | 1 | 2.04 | 43 | 87.76  |
| <b>Saethre-Chotzen syndrome (TWIST1)</b>                                                   | 1 | 2.04 | 44 | 89.80  |
| <b>Spinal muscular atrophy (SMN1)</b>                                                      | 1 | 2.04 | 45 | 91.84  |
| <b>Stickler/Marshall syndrome (COL11A1)</b>                                                | 1 | 2.04 | 46 | 93.88  |
| <b>TBX4-related disorder/heritable PAH/coxopodopatellar syndrome</b>                       | 1 | 2.04 | 47 | 95.92  |
| <b>TUBA1A-related disorder</b>                                                             | 1 | 2.04 | 48 | 97.96  |
| <b>TUBB-related tubulinopathy cortical dysplasia with other brain malformations type 6</b> | 1 | 2.04 | 49 | 100.00 |
