# Supplementary material for: Clinical Decision Analysis of Genetic Evaluation and Testing in 1013 Intensive Care Unit Infants with Congenital Heart Defects Supports Universal Genetic Testing
Source: MDPI journal article supplement (doi:10.3390/genes15040505), 2024-04-18

**Supplemental Results S2.** Proportion of Cytogenetic and Molecular Genetic Disorders across ECA status.

Table SR2-1. Proportion of Cytogenetic and Molecular Genetic Disorders across ECA status.

| Extracardiac Anomaly Status | Cytogenetic Abnormality (Column %) | Molecular Abnormality (%) | Cytogenetic & Molecular (>1 Dx)(%) | Clinical Dx (%) | Total (%)  |
|-----------------------------|------------------------------------|---------------------------|------------------------------------|-----------------|------------|
| ECA No                      | 57 (33.9)                          | 20 (28.6)                 | 1 (20.0)                           | 0 (0)           | 78 (31.8)  |
| ECA Yes                     | 111 (66.1)                         | 50 (71.4)                 | 4 (80.0)                           | 2 (100)         | 167 (68.2) |
| Total                       | 168                                | 70                        | 5                                  | 2               | 245 (100)  |

Note: 78/245 patients (31.8%) were ECA-negative and had either a cytogenetic diagnosis or molecular genetic diagnosis. There were no differences in ECA status among patients with all types of genetic diagnoses (Exact p=0.6673).

Figure SR2-1. Proportion of Genetic Diagnoses by Extracardiac Anomaly Status. Low-count genetic diagnosis types were excluded (i.e., those with >1 concurrent genetic diagnoses or clinical diagnoses with negative/inconclusive genetic testing).

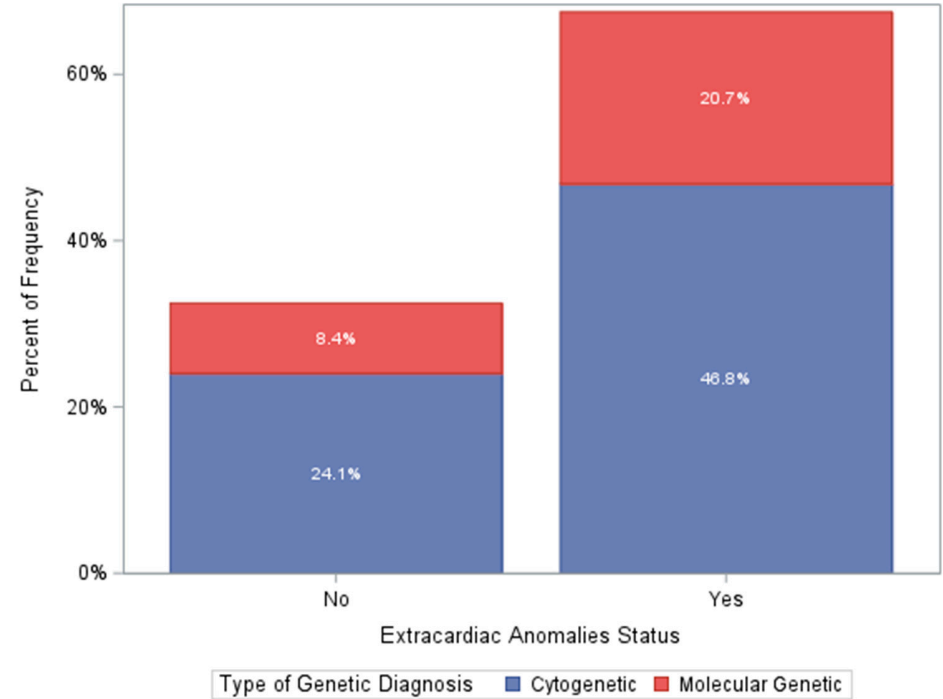

Figure SR2-2. Proportion of Genetic Diagnosis Types. Genetic diagnoses are represented as cytogenetic diagnoses (blue) or molecular diagnoses (red).

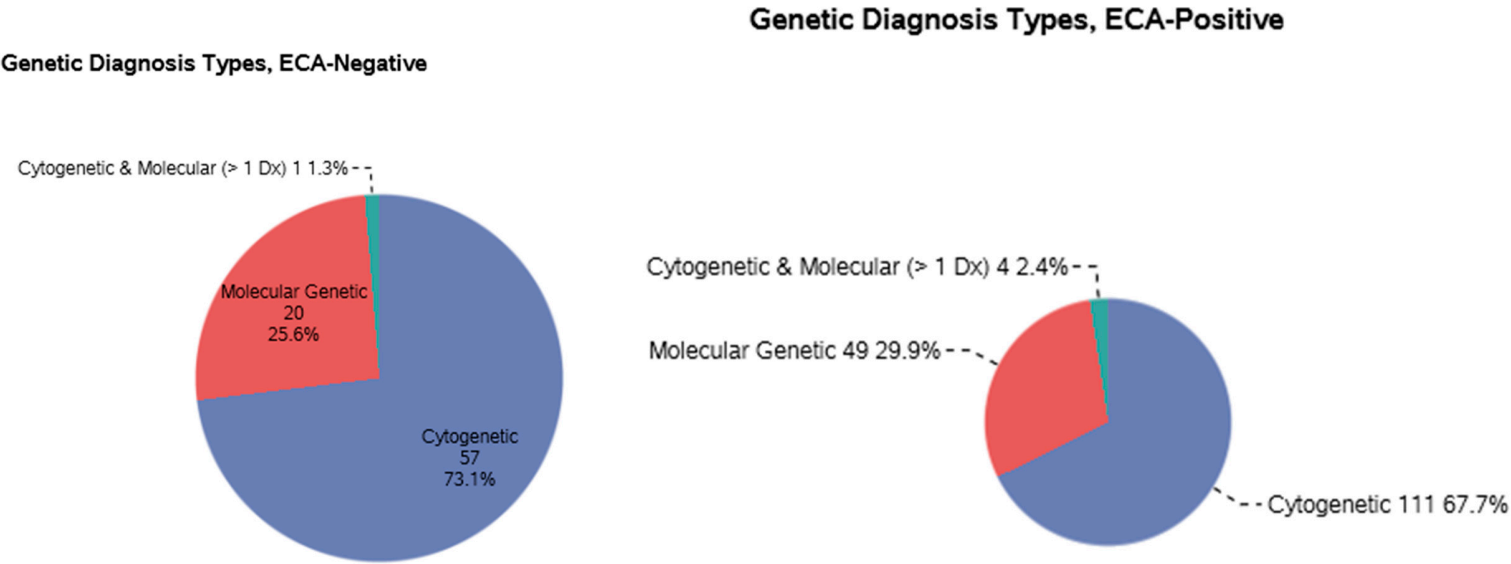

Figure SR2-3. Cohort Results for Genetic Testing. Proportion of genetic testing outcomes are represented separately for cases with or without extracardiac anomalies.

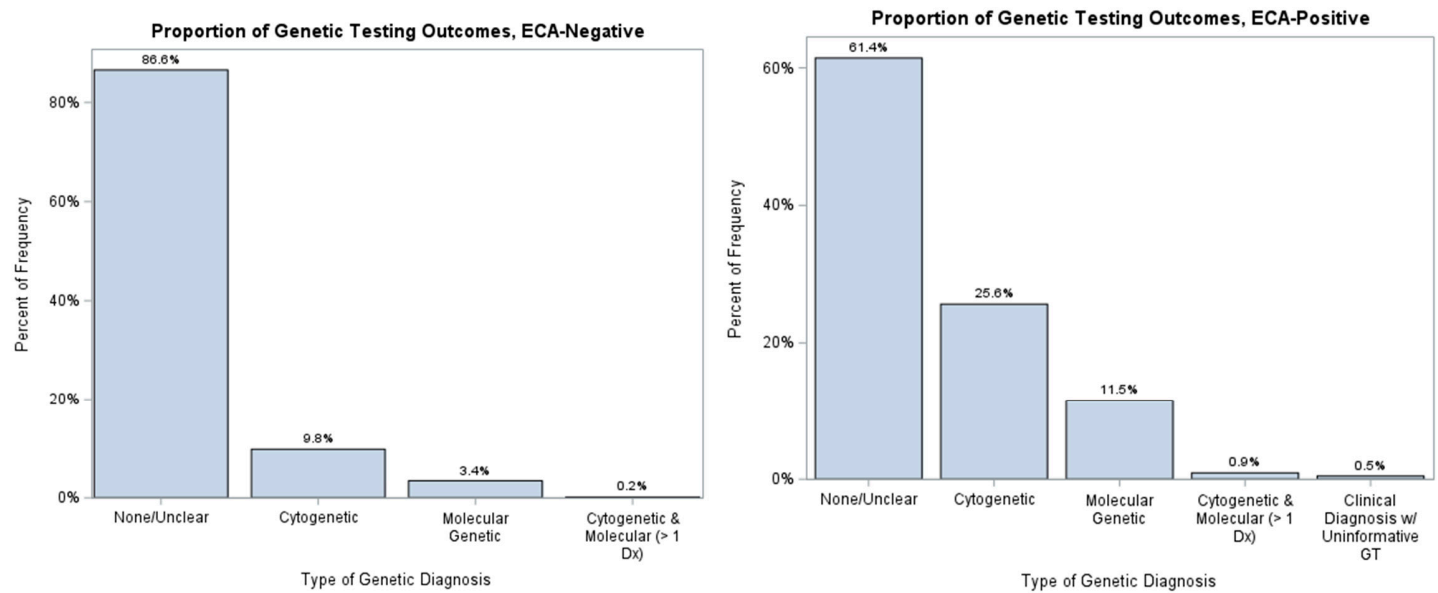

Figure SR2-5. Diagnostic Yield by Genetic Testing Type Stratified by Extracardiac Anomaly Status and Congenital Heart Defect Subtypes: Conotruncal, LVOTO, Complex,

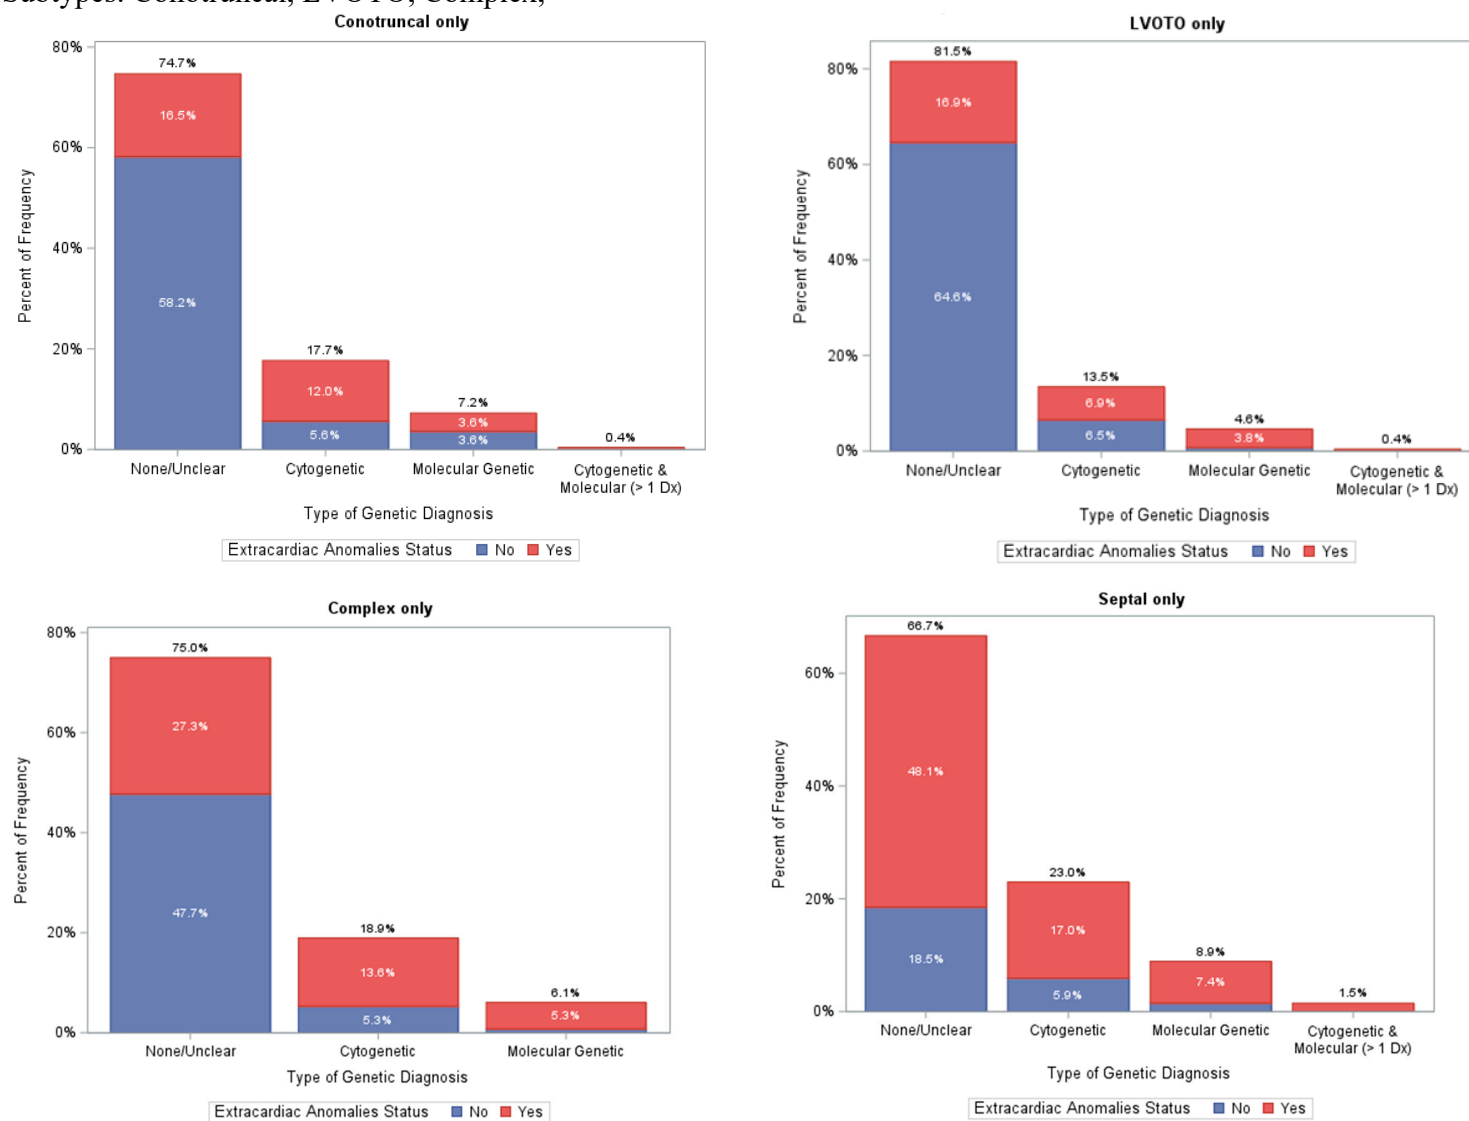

Supplement: s1 [file s1]
