# Supplementary material for: Clinical Decision Analysis of Genetic Evaluation and Testing in 1013 Intensive Care Unit Infants with Congenital Heart Defects Supports Universal Genetic Testing
Source: MDPI journal article supplement (doi:10.3390/genes15040505), 2024-04-18
Supplement: s1 [file s1]

**Supplemental Results S3.** Assessing differences in genetic diagnosis prevalence over the three time periods of our program.

**Table SR3-1.** Assessing prevalence of genetic diagnosis prevalence over time periods of the clinical program. When restricting the trend analysis to each ECA status respectively, only ECA-negative patients had incremental increases in genetic diagnoses identified over time ( $p=0.0015$ ). These gains were not seen in the ECA-positive patients. Overall, the composite  $X^2$  test adjusting for ECA status showed that there was a potential difference across time, though it was marginally significant ( $p=0.0494$ ).

| marginally significant (p = 0.0494).                                       |                      |                       |                      |                       |
|----------------------------------------------------------------------------|----------------------|-----------------------|----------------------|-----------------------|
| Time Period                                                                | ECA-Negative         |                       | ECA-positive         |                       |
|                                                                            | Genetic Diagnosis No | Genetic Diagnosis Yes | Genetic Diagnosis No | Genetic Diagnosis Yes |
|                                                                            |                      |                       |                      |                       |
| 2014-2018                                                                  | 180/195 (92.3%)      | 15/195 (7.7%)         | 76/118 (64.4%)       | 42/118 (35.6%)        |
| 2019-2022                                                                  | 265/314 (84.4%)      | 49/314 (15.6%)        | 142/235 (60.4%)      | 93/235 (39.6%)        |
| 2023                                                                       | 57/71 (80.3%)        | 14/71 (19.7%)         | 49/80 (61.3%)        | 31/80 (38.8%)         |
| Cochran-Armitage Trend Test<br>one-sided p-value                           | p=0.0015             |                       | p=0.2954             |                       |
| Cochran-Mantel-Haenszel X <sup>2</sup> test,<br>controlling for ECA status | p=0.0494             |                       |                      |                       |

**Table SR3-2.** Assessing prevalence of cytogenetic vs. molecular genetic diagnosis types over time periods of the clinical program. When restricting the trend analysis to each ECA status respectively, only ECA-negative patients had incremental increases in genetic diagnoses identified over time ( $p=0.0356$ ). These gains were not seen in the ECA-positive patients. Overall, the composite  $X^2$  test adjusting for ECA status showed that there was a difference across time ( $p=0.0087$ ).

|                                                                            |                       |                             |                       |                             |
|----------------------------------------------------------------------------|-----------------------|-----------------------------|-----------------------|-----------------------------|
|                                                                            | ECA-Negative          |                             | ECA-positive          |                             |
|                                                                            | Cytogenetic Diagnosis | Molecular Genetic Diagnosis | Cytogenetic Diagnosis | Molecular Genetic Diagnosis |
|                                                                            |                       |                             |                       |                             |
| 2014-2018                                                                  | 14/15 (93.3%)         | 1/15 (6.7%)                 | 33/39 (84.6%)         | 6/39 (15.4%)                |
| 2019-2022                                                                  | 34/48 (70.8%)         | 14/48 (29.2%)               | 57/92 (62.0%)         | 35/92 (38.0%)               |
| 2023                                                                       | 9/14 (64.3%)          | 5/14 (35.7%)                | 21/30 (70.0%)         | 9/30 (30.0%)                |
| Cochran-Armitage Trend Test<br>one-sided p-value                           | p=0.0356              |                             | p=0.0651              |                             |
| Cochran-Mantel-Haenszel X <sup>2</sup> test,<br>controlling for ECA status | p=0.0087              |                             |                       |                             |
