# Supplementary material for: Clinical Decision Analysis of Genetic Evaluation and Testing in 1013 Intensive Care Unit Infants with Congenital Heart Defects Supports Universal Genetic Testing
Source: Genes (Basel). 2024 Apr 18;15(4):505. doi: 10.3390/genes15040505 (PMC11050575; doi:10.3390/genes15040505)
Supplement: Supplementary file 1 [file genes-15-00505-s001.zip]

Archive with 4 entries (4 files):
- Supplemental-Methods.pdf
- Supplemental-Results_S1-Diagnoses-cyto-molec-eca.pdf
- Supplemental-Results_S2.pdf
- Supplemental-Results_S3.pdf
